# Supplementary material
Source: PubMed Central journal article supplement (PMC4378867)
Supplement: NIHMS672791-supplement-Supplementary_Data_1.pdf [file NIHMS672791-supplement-Supplementary_Data_1.pdf]

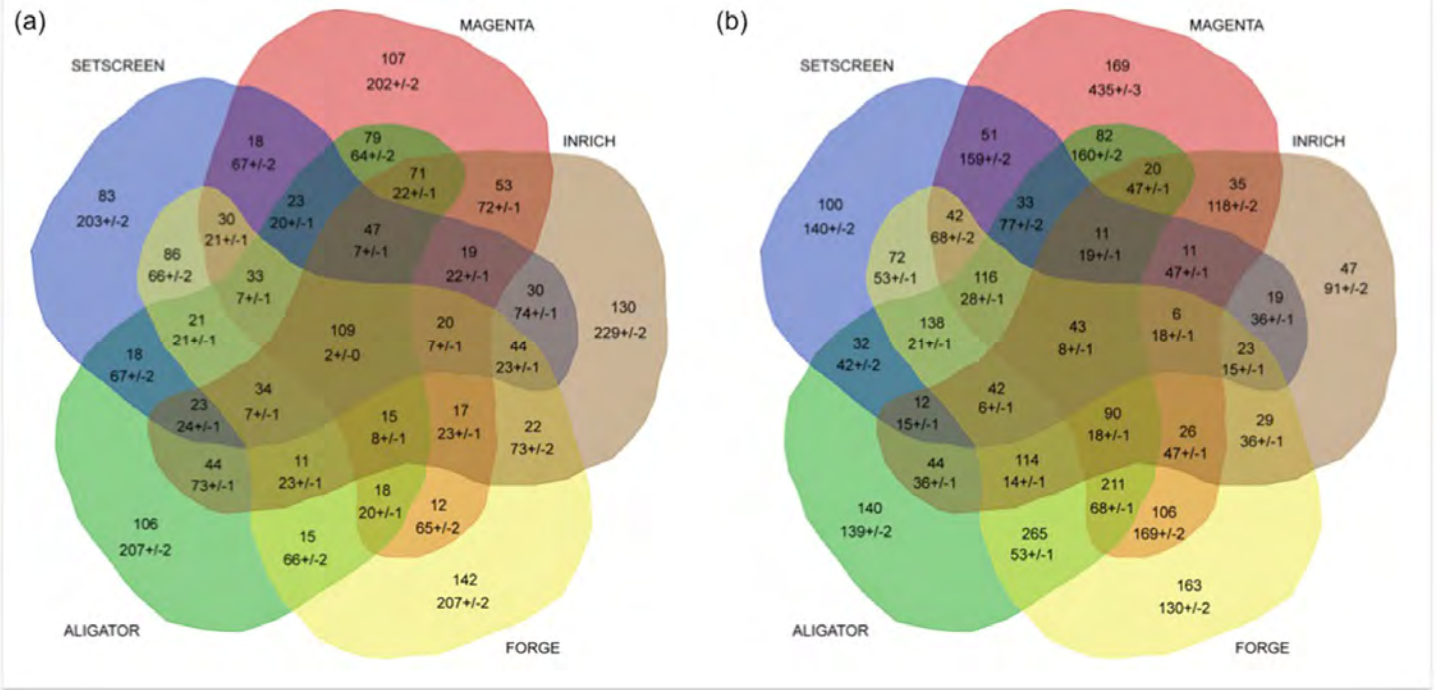

Supplementary Figure 1

**Observed and expected (shown as ranges representing 95% confidence intervals) number of significant pathways overlapping between different sets of results from different methods.**

(a) Analysis conducted using the SCZ dataset, top 25% of each method. (b) Analysis conducted using the NULL dataset, top 25% of each method.

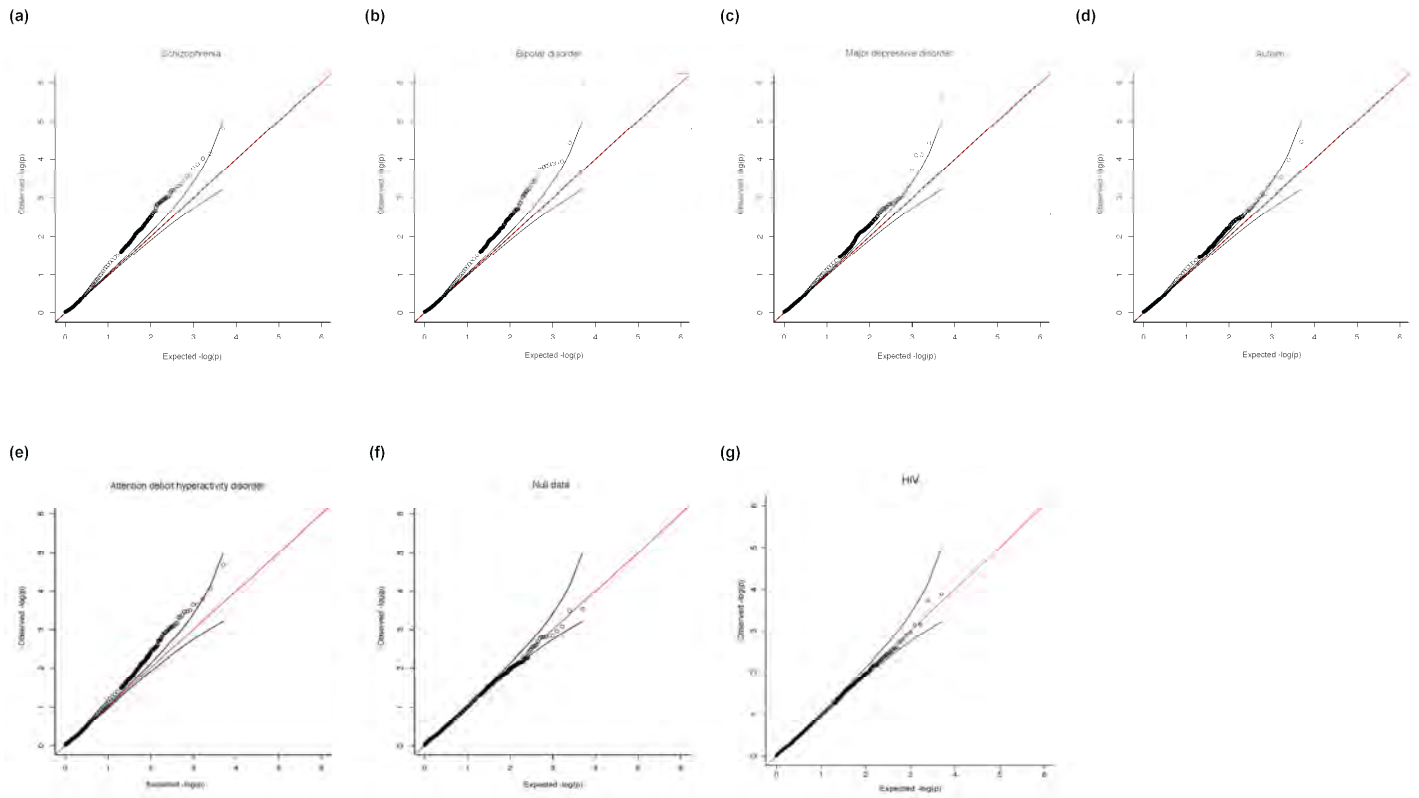

**Supplementary Figure 2**

**Quantile-quantile plots summarizing combined p-values for each method on different phenotypes.**

Order is (a) SCZ, (b) BIP, (c) MDD, (d) AUT, (e) ADD, (f) null data from permutations and, (g) HIV.

# Psychiatric genomewide association study analyses implicate neuronal, immune and histone pathways.

## Table of Contents

|                                                                                       |           |
|---------------------------------------------------------------------------------------|-----------|
| <b>SUPPLEMENTAL ANALYSIS</b>                                                          | <b>2#</b> |
| <b>GENE SET SUMMARIES</b>                                                             | <b>2#</b> |
| <b>COMPARISONS BETWEEN METHODS: METHOD OVERLAP</b>                                    | <b>3#</b> |
| <b>P-VALUE DISTRIBUTIONS FOR ALL DISORDERS</b>                                        | <b>5#</b> |
| <b>RANKED PATHWAYS ACROSS INDIVIDUAL DISEASE GROUPS</b>                               | <b>6#</b> |
| <b>COMBINING PATHWAY ENRICHMENTS ACROSS DISEASES</b>                                  | <b>6#</b> |
| <b>RANKED PATHWAYS ACROSS MULTIPLE INDIVIDUAL DISEASE GROUPS</b>                      | <b>7#</b> |
| <b>RANKING PATHWAYS USING THE FOUR METHODS GIVING THE HIGHEST RANKS</b>               | <b>7#</b> |
| <b>ROBUSTNESS OF ENRICHMENT ANALYSES TO VARIATION IN CORRELATION BETWEEN METHODS.</b> | <b>9#</b> |

## Supplemental Analysis

### Gene set summaries

| Pathway/<br>gene set | # sets | Preparation                                                                                                                                                                                                                                                                                                                         | URL                                                                                                                                                                                                                                                                                                                                                                                                                                                                 |
|----------------------|--------|-------------------------------------------------------------------------------------------------------------------------------------------------------------------------------------------------------------------------------------------------------------------------------------------------------------------------------------|---------------------------------------------------------------------------------------------------------------------------------------------------------------------------------------------------------------------------------------------------------------------------------------------------------------------------------------------------------------------------------------------------------------------------------------------------------------------|
| KEGG                 | 237    | Uniprot file was reduced to remove redundant IDs and converted to Entrez, Ensembl and HGNC IDs; Ensembl file was not edited after download                                                                                                                                                                                          | <a href="ftp://ftp.genome.jp/pub/kegg/genes/organisms/hsa/hsa_ensembl-hsa.list">ftp://ftp.genome.jp/pub/kegg/genes/organisms/hsa/hsa_ensembl-hsa.list</a><br><a href="ftp://ftp.genome.jp/pub/kegg/genes/organisms/hsa/hsa_pathway.list">ftp://ftp.genome.jp/pub/kegg/genes/organisms/hsa/hsa_pathway.list</a><br><a href="ftp://ftp.genome.jp/pub/kegg/genes/organisms/hsa/hsa_uniprot.list">ftp://ftp.genome.jp/pub/kegg/genes/organisms/hsa/hsa_uniprot.list</a> |
| GO                   | 14793  | Uniprot files were saved and Uniprot IDs were converted to Ensembl, Entrez and HGNC IDs. A script was run to recursively grab parent terms for all terms defined in the downloaded file. The result has the following format: Gene Term X, Where 'X' is either direct or indirect, where indirect represents the parent of a parent | <a href="http://cvsweb.geneontology.org/cgiAbin/cvsweb.cgi/go/geneAssociation/goa_human.gz?rev=HEAD">http://cvsweb.geneontology.org/cgiAbin/cvsweb.cgi/go/geneAssociation/goa_human.gz?rev=HEAD</a><br><a href="http://www.geneontology.org/ontology/obo_format_1_2/gene_ontology_ext.obo">http://www.geneontology.org/ontology/obo_format_1_2/gene_ontology_ext.obo</a> (parent terms - "is_a", "part_of")                                                         |
| PANTHER              | 140    | "HUMAN" was parsed and file was saved in Ensembl and Uniprot ID. Uniprot was converted to Entrez and HGNC IDs                                                                                                                                                                                                                       | <a href="ftp://ftp.pantherdb.org/pathway/current_release/SequenceAssociationPathway3.01.txt">ftp://ftp.pantherdb.org/pathway/current_release/SequenceAssociationPathway3.01.txt</a>                                                                                                                                                                                                                                                                                 |
| TARGETSCAN           | 162    | Files were downloaded in HGNC ID format and parsed for "human". Pathways were determined by a context score cutoff of < -0.3 and converted to Uniprot, Ensembl and Entrez IDs                                                                                                                                                       | <a href="http://www.targetscan.org/vert_50/vert_50_data_download/SummaryCounts.txt.zip">http://www.targetscan.org/vert_50/vert_50_data_download/SummaryCounts.txt.zip</a>                                                                                                                                                                                                                                                                                           |
| OMIM                 | 4380   | HGNC file was saved and converted into Ensembl IDs                                                                                                                                                                                                                                                                                  | <a href="ftp://ftp.ncbi.nih.gov/repository/OMIM/ARCHIVE/morbidmap">ftp://ftp.ncbi.nih.gov/repository/OMIM/ARCHIVE/morbidmap</a>                                                                                                                                                                                                                                                                                                                                     |
| REACTOME             | 40     | Files were grepped for human and Uniprot IDs were converted into Entrez, Ensembl and HGNC IDs                                                                                                                                                                                                                                       | <a href="http://www.reactome.org/download/current/curated_and_inferred_uniprot_2_pathways.txt">http://www.reactome.org/download/current/curated_and_inferred_uniprot_2_pathways.txt</a>                                                                                                                                                                                                                                                                             |

**Table S1. Summary of preparation of various pathway/gene sets for analysis.** Pathways considered contained 2-200 genes. Ensembl ids were used as the master gene set, with -35kb upstream and +10kb downstream coordinates used to define the gene boundaries (HG 19; NCBI build 36.1). When multiple transcripts mapped to a single gene locus, the longest transcript was used as a representative.

**Table S2. Summary statistics for all pathway/gene sets used.**

|  | Num. of Pathways Downloaded | Num. of Genes | Num. of Pathways in Restricted Set | Num. of Genes Covered in | Average Pathway Length | Median Pathway Length |
|--|-----------------------------|---------------|------------------------------------|--------------------------|------------------------|-----------------------|
|  |                             |               |                                    |                          |                        |                       |

|                |       | Covered | [10-200] | Restricted Set [10-200] | (restricted set) | (restricted set) |
|----------------|-------|---------|----------|-------------------------|------------------|------------------|
| KEGG           | 237   | 5946    | 214      | 5202                    | 65.49            | 54               |
| GO             | 14793 | 17764   | 4550     | 13794                   | 44.93            | 26               |
| PANTHER        | 140   | 2207    | 72       | 1628                    | 46.12            | 37.5             |
| TARGETSCAN     | 162   | 10901   | 77       | 4563                    | 84.64            | 76               |
| REACTOME       | 40    | 1518    | 28       | 906                     | 59.82            | 52               |
| OMIM           | 4380  | 3170    | 8        | 97                      | 12.5             | 12.5             |
| Total (unique) | 19752 | 18848   | 4949     | 14593                   |                  |                  |

### ***Comparisons between methods: method overlap***

The results obtained from this procedure are represented in Figure S2 as a 5-way Venn diagram (<http://bioinformatics.psb.ugent.be/webtools/Venn/>). Each overlap quantity is associated with an expected value that is derived by random sampling with no correlation among methods. We conclude that top pathways from the five methods overlap more than expected by chance. For example, in the SCZ dataset, there are 109 independent pathways shared across the top 25% of all methods, while only 2 are expected by chance (Figure S2(a)). Similar patterns were seen for the NULL dataset (Figure S2(b)).



### ***P-value distributions for all disorders***

We ran 5 methods on each of the 5 phenotypes and on a null dataset. The method-wise p-values were then combined as described above. QQ plots summarize the p-value distribution.

HERE

**Figure S2. Quantile-quantile plots summarizing combined p-values for each method on different phenotypes.** Order is (a) SCZ, (b) BIP, (c) MDD, (d) AUT, (e) ADD, (f) null data from permutations and, (g) HIV.

**Table S3. Pearson correlations of pathway enrichments between pairs of methods.** Calculated on 1,918 pathways with Jaccard coefficient <0.2, averaged across five psychiatric disorders (averaging performed by calculating the mean of the z-transformed correlation coefficients for the individual disorders, weighted by the inverse of the variance). All correlations nominally significant except Forge-Magenta and Magenta-Aligator on the null dataset.

|                  | <b>Forge</b> | <b>Magenta</b> | <b>Inrich</b> | <b>Aligator</b> |
|------------------|--------------|----------------|---------------|-----------------|
| <b>Setscreen</b> | 0.653, 9543  | 0.321, 9340    | 0.278, 2528   | 0.355, 3824     |
| Forge            |              | 0.213, 9293    | 0.137, 2526   | 0.187, 3823     |
| Magenta          |              |                | 0.335, 2442   | 0.468, 3705     |
| Inrich           |              |                |               | 0.566, 2288     |

## Ranked pathways across individual disease groups

### Combining pathway enrichments across diseases

|      | AUT   | BIP   | HIV   | MDD   | NULL  | SCZ   |
|------|-------|-------|-------|-------|-------|-------|
| ADHD | 0.170 | 0.234 | 0.126 | 0.192 | 0.119 | 0.182 |
| AUT  |       | 0.238 | 0.125 | 0.176 | 0.114 | 0.246 |
| BIP  |       |       | 0.102 | 0.201 | 0.127 | 0.290 |
| HIV  |       |       |       | 0.181 | 0.166 | 0.092 |
| MDD  |       |       |       |       | 0.111 | 0.254 |
| NULL |       |       |       |       |       | 0.156 |

**Table S4. Pearson correlation of pathway-specific enrichment p-values between pairs of datasets.**  
Calculated on 1,918 Jaccard-pruned pathways.

### Table S5. Pathway results for each disease/cross-disease dataset.

See excel file "Table\_S5.xls".

|      | AUT     | BIP     | HIV     | MDD     | NULL    | SCZ     |
|------|---------|---------|---------|---------|---------|---------|
| ADHD | P=0.044 | P<0.001 | P=0.619 | P=0.002 | P=0.732 | P=0.019 |
| AUT  |         | P<0.001 | P=0.625 | P=0.029 | P=0.789 | P<0.001 |
| BIP  | P=0.244 |         | P=0.912 | P<0.001 | P=0.636 | P<0.001 |
| HIV  | P=0.993 | P=0.855 |         | P=0.016 | P=0.080 | P=0.969 |
| MDD  | P=0.989 | P=0.166 | P=0.749 |         | P=0.837 | P<0.001 |
| NULL | P=0.215 | P=0.862 | P=0.453 | P=0.933 |         | P=0.158 |
| SCZ  | P=0.015 | P=0.003 | P=0.787 | P=0.006 | P=0.788 |         |

**Table S6.** Significance of (a) Pearson correlation of pathway-specific enrichment p-values (top triangle) and (b) overlap in top 10% of enriched pathways (bottom triangle, shaded) between datasets, allowing for the mean correlation in pathway-specific enrichment p-values observed with the null dataset (0.132). Calculated on 1,918 Jaccard-pruned ( $\leq 0.2$ ) pathways.



## ***Ranked pathways across multiple individual disease groups***

**Table S7.** Ranked list of pathways when combined across 3 well-powered disease groups.

See excel file "*Table\_S7.xls*".

**Table S8.** Ranked list of pathways when combined across SCZ, HIV and NULL datasets.

See excel file "*Table\_S8.xls*".

**Table S9.** Details related to module-level summaries of spatial, temporal, and cell-type specific expression patterns.

See excel file "*Table\_S9.xls*".

**Table S10.** Ranked list of pathways when combined across all 5 disease groups.

See excel file "*Table\_S10.xls*".

**Table S11.** P-values for the SNPs in each gene in each disorder and their pathways membership are presented for all pathways with  $q < 0.1$ .

See excel file "*Table\_S11.xls*".

## ***Ranking pathways using the four methods giving the highest ranks***

Although pathway enrichment p-values from the five analysis methods are significantly correlated with each other (see Table S3), it is possible that one of the methods may differ from the others for any given pathway. Such a discrepancy may reduce the average rank of the pathway and thus its significance. For example, a pathway with ranks (1, 1, 1, 1, 996) has the same average rank as one with ranks (200, 200, 200, 200, 200), but should be considered as more important. To increase power to detect enrichment to such pathways, we performed pathway enrichment analyses as described previously using the average of the four highest ranks for each pathway (discarding the lowest). A comparison of the enrichment p-values obtained by this approach to those based on all five methods are given in Table S11 for the significant pathways for individual diseases reported in Table 1, and in Table S12 for the 15 pathways with  $q < 0.05$  in the combined SCZ+BIP+MDD analysis (Table 2). Using the four highest ranks in general had little effect on the enrichment p-values for these

pathways, although the three most significant pathways in schizophrenia, all related to the synapse, had q-values <0.05. Furthermore, using the four highest ranks discovered no other significant pathways.

| P rank (all 5) | q-value (all 5) | p rank (best 4) | q-value (best 4) | Pathway ID    | Description                                    |
|----------------|-----------------|-----------------|------------------|---------------|------------------------------------------------|
| <b>BIP</b>     |                 |                 |                  |               |                                                |
| 1.01E-06       | 0.005           | 9.70E-06        | 0.024            | GO:51568      | histone H3-K4 methylation                      |
| 3.82E-05       | 0.093           | 4.65E-06        | 0.023            | path:hsa05218 | Melanoma                                       |
| 1.16E-04       | 0.093           | 5.06E-04        | 0.209            | GO:7129       | (chromosomal) synapsis                         |
| 1.27E-04       | 0.093           | 3.06E-04        | 0.191            | path:hsa05213 | Endometrial cancer                             |
| 1.34E-04       | 0.093           | 2.54E-04        | 0.191            | P00003        | Alzheimer_disease-amyloid_secretase_pathway    |
| 1.35E-04       | 0.093           | 1.73E-04        | 0.191            | path:hsa05215 | Prostate cancer                                |
| 1.50E-04       | 0.093           | 4.19E-04        | 0.209            | path:hsa05216 | Thyroid cancer                                 |
| 1.59E-04       | 0.093           | 8.93E-04        | 0.218            | GO:90066      | regulation of anatomical structure size        |
| 1.81E-04       | 0.093           | 1.97E-04        | 0.191            | path:hsa05214 | Glioma                                         |
| 1.87E-04       | 0.093           | 7.96E-04        | 0.218            | GO:70192      | chromosome organization involved in meiosis    |
| <b>SCZ</b>     |                 |                 |                  |               |                                                |
| 1.58E-05       | 0.078           | 2.73E-05        | 0.045            | GO:14069      | postsynaptic density                           |
| 7.15E-05       | 0.160           | 2.32E-05        | 0.045            | GO:45211      | postsynaptic membrane                          |
| 9.67E-05       | 0.160           | 2.48E-05        | 0.045            | GO:43197      | dendritic spine                                |
| 1.36E-04       | 0.168           | 1.94E-04        | 0.192            | GO:51568      | histone H3-K4 methylation                      |
| 1.74E-04       | 0.173           | 4.85E-04        | 0.291            | GO:33267      | axon part                                      |
| <b>MDD</b>     |                 |                 |                  |               |                                                |
| 2.63E-06       | 0.012           | 2.28E-05        | 0.111            | GO:8601       | protein phosphatase type 2A regulator activity |
| 3.88E-05       | 0.092           | 2.38E-04        | 0.165            | GO:34330      | cell junction organization                     |
| 7.70E-05       | 0.094           | 1.82E-04        | 0.165            | GO:43297      | apical junction assembly                       |
| 7.92E-05       | 0.094           | 8.14E-05        | 0.165            | GO:45216      | cell-cell junction organization                |
| 1.97E-04       | 0.186           | 2.38E-04        | 0.165            | GO:31056      | regulation of histone modification             |

**Table S12.** Effect of enrichment analysis based on the average of the four highest ranks on the top pathways from BIP, SCZ and MDD (Table 1).

| Rank | Combined p (all 5) | q-value (all 5) | Combined p (best 4) | q-value (best 4) | Pathway ID | Description                                               |
|------|--------------------|-----------------|---------------------|------------------|------------|-----------------------------------------------------------|
| 1    | 5.75E-08           | 0.0003          | 2.67E-07            | 0.0013           | GO:51568   | histone H3-K4 methylation                                 |
| 2    | 1.46E-05           | 0.0362          | 3.08E-05            | 0.0336           | GO:16571   | histone methylation                                       |
| 3    | 4.73E-05           | 0.0414          | 9.36E-05            | 0.0515           | GO:43414   | macromolecule methylation                                 |
| 4    | 5.10E-05           | 0.0414          | 8.21E-05            | 0.0508           | GO:34968   | histone lysine methylation                                |
| 5    | 5.58E-05           | 0.0414          | 1.48E-04            | 0.0709           | GO:45216   | cell-cell junction organization                           |
| 6    | 5.69E-05           | 0.0414          | 1.89E-05            | 0.0336           | P00003     | Alzheimer_disease-amyloid_secretase_pathway               |
| 7    | 5.86E-05           | 0.0414          | 6.72E-05            | 0.0475           | P04393     | Ras_Pathway                                               |
| 8    | 7.12E-05           | 0.0422          | 2.73E-04            | 0.0712           | GO:8601    | protein phosphatase type 2A regulator activity            |
| 9    | 7.83E-05           | 0.0422          | 1.97E-04            | 0.0712           | GO:43297   | apical junction assembly                                  |
| 10   | 9.25E-05           | 0.0422          | 6.08E-05            | 0.0475           | P00052     | TGF-beta_signaling_pathway                                |
| 11   | 9.53E-05           | 0.0422          | 2.85E-04            | 0.0712           | GO:14069   | postsynaptic density                                      |
| 12   | 0.0001             | 0.0422          | 1.58E-04            | 0.0709           | GO:32869   | cellular response to insulin stimulus                     |
| 13   | 0.0001             | 0.0450          | 3.43E-04            | 0.0712           | P00010     | B_cell_activation                                         |
| 14   | 0.0001             | 0.0450          | 2.17E-04            | 0.0712           | GO:8757    | S-adenosylmethionine-dependent methyltransferase activity |
| 15   | 0.0001             | 0.0454          | 2.06E-03            | 0.1725           | GO:23061   | signal release                                            |
| 16   | 0.0002             | 0.0473          | 9.67E-04            | 0.1328           | GO:34330   | cell junction organization                                |

**Table S13.** Effect of enrichment analysis based on the average of the four highest ranks on the 16 pathways with  $q < 0.05$  from a combined analysis of BIP, SCZ and MDD (Table 2).

### ***Robustness of enrichment analyses to variation in correlation between methods.***

To obtain an accurate significance level for the average rank across methods for each pathway, it is necessary to model the dependence between the analysis methods. We did this by calculating the correlation in p-values between each pair of methods based on the null dataset (such that correlations measure only the dependence between methods and not the presence of true signals that would induce correlation between methods). These correlations are given in Table S13, together with the numbers of independent pathways with Jaccard coefficient  $< 0.2$  from which they were derived. This set of correlation coefficients were then used to generate sets of correlated uniform variants to represent enrichment p-values, which were then turned into simulated sets of ranks to obtain empirical p-values for the average ranks for each pathway in the observed data. The correlations given in Table S13 are only estimates of the true correlation, and as such susceptible to stochastic variation. To investigate the effect of variation in correlation between methods on the pathway enrichments, we calculated 95% confidence intervals for each of the correlations given in Table S13 (using the number of

pathways from which they were generated). Then, we performed two enrichment analyses using the same methodology as describe earlier: one with each of the correlation coefficients between methods set to the lower bound of the 95% confidence interval (or zero, if this was negative) and one with the correlation coefficients set to the upper bound of the 95% confidence interval. In the first analysis, dependence between methods is likely to be underestimated, resulting in increased significance for pathways with high average rank across methods. Conversely, in the second analysis, dependence between methods is overestimated, thus reducing significance of pathways with high average rank, and thus giving a conservative analysis. The first analysis was applied to the null dataset and the combined analysis of the null, schizophrenia and HIV datasets, in order to check that no false-positive results were generated (after correcting for multiple testing of pathways). The second analysis was performed on the individual disease samples, as well as the analyses combining schizophrenia, bipolar and major depression, in order to test whether the results are still significant when a conservative assumption is made about the dependence between analysis methods. Results are given in Table S14 for the significant pathways for individual diseases reported in Table 1, and in Table S15 for the 15 pathways with  $q < 0.05$  in the combined SCZ+BIP+MDD analysis (Table 2).

As Tables S14 and S15 show, making conservative assumptions about the dependency between analysis methods has little effect on the significance of the top pathways. Likewise, underestimating the dependency between methods does not induce false positives in the null dataset (min  $q$ -value=0.187) or the combined SCZ+HIV+null analysis (min  $q$ =0.075). Thus, the analyses presented in this paper are robust to assumptions regarding the extent of correlation between the analysis methods.

|                  | <b>Forge</b> | <b>Magenta</b> | <b>Inrich</b> | <b>Aligator</b> |
|------------------|--------------|----------------|---------------|-----------------|
| <b>Setscreen</b> | 0.659, 1798  | 0.068, 1868    | 0.205, 959    | 0.407, 802      |
| Forge            |              | 0.025, 1749    | 0.141, 874    | 0.328, 721      |
| Magenta          |              |                | 0.290, 933    | 0.091, 778      |
| Inrich           |              |                |               | 0.351, 721      |

**Table S14.** Pearson correlations of pathway enrichments between pairs of methods on the null dataset, calculated on 1,918 pathways with Jaccard coefficient  $< 0.2$ , The number of pathways used to calculate each correlation is also given.

| <b>P rank (original)</b> | <b>q-value (original)</b> | <b>p rank (upper 95)</b> | <b>q-value (upper 95)</b> | <b>Pathway ID</b> | <b>Description</b> |
|--------------------------|---------------------------|--------------------------|---------------------------|-------------------|--------------------|
|--------------------------|---------------------------|--------------------------|---------------------------|-------------------|--------------------|

| <b>BIP</b> |       |          |       |               |                                                |
|------------|-------|----------|-------|---------------|------------------------------------------------|
| 1.01E-06   | 0.005 | 2.22E-06 | 0.011 | GO:51568      | histone H3-K4 methylation                      |
| 3.82E-05   | 0.093 | 4.28E-05 | 0.086 | path:hsa05218 | Melanoma                                       |
| 1.16E-04   | 0.093 | 1.15E-04 | 0.086 | GO:7129       | (chromosomal) synapsis                         |
| 1.27E-04   | 0.093 | 1.28E-04 | 0.086 | path:hsa05213 | Endometrial cancer                             |
| 1.34E-04   | 0.093 | 1.28E-04 | 0.086 | P00003        | Alzheimer_disease-amyloid_secretase_pathway    |
| 1.35E-04   | 0.093 | 1.30E-04 | 0.086 | path:hsa05215 | Prostate cancer                                |
| 1.50E-04   | 0.093 | 1.43E-04 | 0.086 | path:hsa05216 | Thyroid cancer                                 |
| 1.59E-04   | 0.093 | 1.50E-04 | 0.086 | GO:90066      | regulation of anatomical structure size        |
| 1.81E-04   | 0.093 | 1.76E-04 | 0.086 | path:hsa05214 | Glioma                                         |
| 1.87E-04   | 0.093 | 1.81E-04 | 0.086 | GO:70192      | chromosome organization involved in meiosis    |
| <b>SCZ</b> |       |          |       |               |                                                |
| 1.58E-05   | 0.078 | 2.16E-05 | 0.107 | GO:14069      | postsynaptic density                           |
| 7.15E-05   | 0.160 | 8.66E-05 | 0.172 | GO:45211      | postsynaptic membrane                          |
| 9.67E-05   | 0.160 | 1.09E-04 | 0.172 | GO:43197      | dendritic spine                                |
| 1.36E-04   | 0.168 | 1.39E-04 | 0.172 | GO:51568      | histone H3-K4 methylation                      |
| 1.74E-04   | 0.173 | 1.80E-04 | 0.178 | GO:33267      | axon part                                      |
| <b>MDD</b> |       |          |       |               |                                                |
| 2.63E-06   | 0.012 | 6.46E-06 | 0.029 | GO:8601       | protein phosphatase type 2A regulator activity |
| 3.88E-05   | 0.092 | 4.67E-05 | 0.094 | GO:34330      | cell junction organization                     |
| 7.70E-05   | 0.094 | 8.08E-05 | 0.094 | GO:43297      | apical junction assembly                       |
| 7.92E-05   | 0.094 | 8.28E-05 | 0.094 | GO:45216      | cell-cell junction organization                |
| 1.97E-04   | 0.186 | 1.90E-04 | 0.172 | GO:31056      | regulation of histone modification             |

**Table S15.** Effect of setting correlations between methods to the upper bound of the 95% confidence interval (thereby overestimating dependence between methods) on the enrichment analysis of the top pathways from BIP, SCZ and MDD (Table 1).

| Rank | Combined p (original) | q-value (original) | Combined p (upper 95) | q-value (upper 95) | Pathway ID | Description               |
|------|-----------------------|--------------------|-----------------------|--------------------|------------|---------------------------|
| 1    | 5.75E-08              | 0.0003             | 1.13E-07              | 0.0006             | GO:51568   | histone H3-K4 methylation |

|    |          |        |          |        |          |                                                           |
|----|----------|--------|----------|--------|----------|-----------------------------------------------------------|
| 2  | 1.46E-05 | 0.0362 | 1.53E-05 | 0.0378 | GO:16571 | histone methylation                                       |
| 3  | 4.73E-05 | 0.0414 | 5.18E-05 | 0.0485 | GO:43414 | macromolecule methylation                                 |
| 4  | 5.10E-05 | 0.0414 | 5.99E-05 | 0.0485 | GO:34968 | histone lysine methylation                                |
| 5  | 5.58E-05 | 0.0414 | 6.26E-05 | 0.0485 | GO:45216 | cell-cell junction organization                           |
| 6  | 5.69E-05 | 0.0414 | 6.38E-05 | 0.0485 | P00003   | Alzheimer_disease-amyloid_secretase_pathway               |
| 7  | 5.86E-05 | 0.0414 | 6.85E-05 | 0.0485 | P04393   | Ras_Pathway                                               |
| 8  | 7.12E-05 | 0.0422 | 1.45E-04 | 0.0553 | GO:8601  | protein phosphatase type 2A regulator activity            |
| 9  | 7.83E-05 | 0.0422 | 8.89E-05 | 0.0550 | GO:43297 | apical junction assembly                                  |
| 10 | 9.25E-05 | 0.0422 | 1.16E-04 | 0.0553 | P00052   | TGF-beta_signaling_pathway                                |
| 11 | 9.53E-05 | 0.0422 | 1.28E-04 | 0.0553 | GO:14069 | postsynaptic density                                      |
| 12 | 0.0001   | 0.0422 | 1.25E-04 | 0.0553 | GO:32869 | cellular response to insulin stimulus                     |
| 13 | 0.0001   | 0.0450 | 1.56E-04 | 0.0553 | P00010   | B_cell_activation                                         |
| 14 | 0.0001   | 0.0450 | 1.38E-04 | 0.0553 | GO:8757  | S-adenosylmethionine-dependent methyltransferase activity |
| 15 | 0.0001   | 0.0454 | 1.82E-04 | 0.0582 | GO:23061 | signal release                                            |
| 16 | 0.0002   | 0.0473 | 1.88E-04 | 0.0582 | GO:34330 | cell junction organization                                |

**Table S16.** Effect of setting correlations between methods to the upper bound of the 95% confidence interval (thereby overestimating dependence between methods) on the enrichment analysis of the 16 pathways with  $q < 0.05$  from a combined analysis of BIP, SCZ and MDD (Table 2).

**Table S17.** Information related to the supervised network analysis of 797 genes, specifying gene set membership from the 3 major pathways, module membership, and relative connectivity (kME) to each module.

See excel file "Table\_S17.xls".
